# **Explaining the primate extinction crisis: predictors of extinction risk and active threats**

Maria J.A. Creighton<sup>a</sup> & Charles L. Nunn<sup>bc</sup>

<sup>a</sup>Department of Biology, Duke University, Durham, North Carolina, USA

<sup>b</sup>Department of Evolutionary Anthropology, Duke University, Durham, North Carolina, USA

<sup>c</sup>Global Health Institute, Duke University, Durham, North Carolina, USA

\*Author for correspondence: [maria.creighton@duke.edu](mailto:maria.creighton@duke.edu); Department of Biology, Duke University, 130 Science Drive, Durham, NC 27708, USA; ORCID: <https://orcid.org/0000-0003-1337-1946>

**DECLARATIONS OF INTEREST:** None

1 **ABSTRACT:**

2 Explaining why some species are disproportionately impacted by the extinction crisis is of critical  
3 importance for conservation biology as a science and for proactively protecting species that are  
4 likely to become threatened in the future. Using the most current data on threat status, population  
5 trends, and threat types for 446 primate species, we advance previous research on the determinants  
6 of extinction risk by including a wider array of phenotypic traits as predictors, filling gaps in these  
7 trait data using multiple imputation, and considering more explicitly the mechanisms that connect  
8 organismal traits to extinction risk. Our Bayesian phylogenetically controlled analyses reveal that  
9 larger-bodied and insular species exhibit higher threat status, while those that are more omnivorous  
10 and live in larger groups have lower threat status. The same traits are not linked to risk when  
11 repeating our analyses with older IUCN data, suggesting that the traits that influence species risk  
12 are changing as anthropogenic effects continue to transform natural landscapes. We also show that  
13 larger-bodied and arboreal species are more susceptible to key threats responsible for primate  
14 population declines. Collectively, these results provide new insights to the determinants of primate  
15 extinction and identify the mechanisms (i.e., threats) that link traits to risk.

16

17 **INTRODUCTION:**

18 Anthropogenic activity is causing species to disappear at an alarming rate. However, not all species  
19 are affected equally: some species show no changes in abundance while others are increasing in  
20 abundance as human activity increases. Explaining why some species are more susceptible to  
21 extinction than others has become a major goal of conservation biologists as these contributions  
22 help to both explain current extinction patterns and allow for proactive protection of species  
23 possessing traits that could increase their probability of becoming imperiled. Previous studies have  
24 shown that phenotypic traits affect a species' susceptibility to extinction (Chichorro et al., 2019).  
25 Physical traits such as large body size and life history traits such as long generation lengths have  
26 been associated with increased risk of extinction (Purvis et al., 2000; Cardillo & Bromham, 2001;  
27 Cardillo et al., 2005; Lee & Jetz, 2011; Matthews et al., 2011). Behavioral traits have also been  
28 linked to increased extinction risk, including small group size and reduced innovativeness  
29 (Davidson et al., 2009; 2012; Ducatez et al., 2020).

30 While much effort has been put toward identifying how different traits covary with  
31 extinction risk, important knowledge gaps have limited the effectiveness of these analyses. First,

32 only a handful of studies have incorporated a broad range of traits in a single analysis. Chichorro  
33 et al. (2019) reviewed studies investigating the correlates of extinction risk and found significant  
34 variability in the traits that were investigated (or controlled for). In addition, some traits have only  
35 recently been linked to extinction risk, such as behavioral flexibility (Ducatez et al., 2020), and  
36 thus have not been widely investigated across clades.

37 Second, the relationship between the actual anthropogenic drivers of environmental change  
38 that are responsible for extinction and species traits are understudied in many clades (e.g., in  
39 primates; Estrada et al., 2017), limiting the impact of these comparative studies in applied  
40 conservation (Cardillo & Meijaard, 2012). Identifying which threats are most impactful to species  
41 with different trait types would enable actionable conservation steps. This could include mitigating  
42 key threats in susceptible species' ranges and identifying which species are most likely to be  
43 vulnerable to certain types of environmental change in the future. Despite this possible benefit of  
44 considering specific threats, previous studies have been mostly limited to linking traits and species'  
45 threat status, although a few exceptions have incorporated consideration of threats into these  
46 analyses (e.g., Purvis et al., 2005; González-Suárez et al., 2013; Murray et al., 2014).

47 Lastly, we lack information on relevant traits for many species, resulting in incomplete  
48 data. The species for which we lack data may be systematically biased towards those that are more  
49 difficult to study, such as arboreal or nocturnal species. In addition to reducing statistical power,  
50 removing these species from analyses has potential to bias observed relationships between  
51 variables (Nakagawa & Freckleton, 2008) and can result in a loss of real information when some  
52 traits included in an analysis have better data coverage than others.

53 Primates have been especially important in studies assessing predictors of extinction risk  
54 (Purvis et al., 2000; Purvis et al., 2005; Matthews et al., 2011; Machado et al., 2022). Primates are  
55 one of the most threatened animal clades, with ~65% of species at risk of extinction (IUCN, 2021).  
56 The number of threatened primate species is on the rise (up ~5% in approximately 5 years), yet  
57 the last comprehensive assessment of the major determinants of primate extinction risk was  
58 published over 20 years ago (Purvis et al., 2000). The number of recognized primate species has  
59 changed dramatically since earlier studies, having more than doubled from 180 to over 500 in the  
60 past few decades (Rylands & Mittermeier, 2014; Creighton et al. 2022). As a result of these  
61 taxonomic changes and limitations of older phylogenies, older studies focused on a relatively small  
62 number of currently recognized primate species. More speciose and up-to-date phylogenies have

63 recently become available (Upham et al., 2019) in addition to a greater quantity and quality of trait  
64 data for many species. These contributions create an opportunity for the inclusion of more  
65 described primate species in comparative analyses, bringing us closer to capturing the true scope  
66 of primate diversity. Primates are crucial components of tropical biodiversity, core players in the  
67 function of ecosystems, and central to many cultures and religions (Estrada et al., 2017). It is thus  
68 an urgent goal to determine which biological and behavioral traits contribute to primate extinction  
69 vulnerability and how these traits interact with anthropogenic impacts to contribute to population  
70 declines.

71 Here, we analyze the biological and behavioral determinants of primate extinction risk  
72 using a phylogenetic comparative approach. We investigate the relationship between multiple  
73 phenotypic traits and two measures of extinction risk reported by the International Union for  
74 Conservation of Nature (IUCN): threat status and population trend. We then assess how these same  
75 traits covary with vulnerability to the major threats facing primate species. This research addresses  
76 the gaps above by including multiple traits in the analysis and using imputation approaches based  
77 on phylogeny and phenotypic traits to fill in data for species with missing trait values. In addition,  
78 by investigating population trends and specific threats, we improve understanding of the  
79 connections between specific traits and the abundance of primates.

80 We focus on 10 key traits with proposed links to extinction risk (Table 1).

81

82 Table 1: The predicted direction of effect of biological and behavioral traits on extinction risk.

| <b>Trait:</b>                  | <b>Expected risk</b>  | <b>Reason:</b>                                                                                                                                                          |
|--------------------------------|-----------------------|-------------------------------------------------------------------------------------------------------------------------------------------------------------------------|
|                                | <b>high when:</b>     |                                                                                                                                                                         |
| <b>Body mass (g)</b>           | Large body            | Animals with large bodies have slow life histories and have been previously shown to be at increased extinction risk (Cardillo & Bromham, 2001; Cardillo et al., 2005). |
| <b>Generation length (yrs)</b> | Long generations      | Slow life histories mean fewer generations to adapt to environmental changes (Purvis et al., 2000).                                                                     |
| <b>Home range size (ha)</b>    | Large home range size | Species that have individuals that maintain large home ranges are particularly vulnerable to habitat                                                                    |

---

|                                      |                  |       |                                                                                                                                                                                                                                                                                                                  |
|--------------------------------------|------------------|-------|------------------------------------------------------------------------------------------------------------------------------------------------------------------------------------------------------------------------------------------------------------------------------------------------------------------|
|                                      |                  |       | loss, degradation, and edge effects (Woodroffe & Ginsberg, 1998; Purvis et al., 2000).                                                                                                                                                                                                                           |
| <b>Group size</b>                    | Small group size |       | Small group size has been associated with heightened extinction risk, perhaps because large groups reduce predation and enhance foraging (Davidson et al., 2009; 2012).                                                                                                                                          |
| <b>Brain volume (cm<sup>3</sup>)</b> | Small volume     | brain | Large relative brain size is a proxy of general intelligence and behavioral flexibility (Reader et al., 2011; Navarrete et al., 2016), which have been associated with reduced extinction risk in birds (Ducatez et al., 2020).                                                                                  |
| <b>Omnivory (true or false)</b>      | False            |       | Animals with a large dietary breadth can rely on a wider range of food types when resources become limited (Boyles & Storm, 2007).                                                                                                                                                                               |
| <b>Social system</b>                 | Polygynandry     |       | Species characterized by complex social organization are hypothesized to have larger critical population sizes (i.e., more individuals must persist to maintain what is considered to be a healthy population) and may therefore go extinct more quickly than species in simpler social systems (Höglund, 1996). |
| <b>Lifestyle</b>                     | Arboreal         |       | Strictly arboreal species are disproportionately affected from losing habitat via deforestation (Munstermann et al., 2022).                                                                                                                                                                                      |
| <b>Insularity (true or false)</b>    | True             |       | Island ecosystems are particularly vulnerable to anthropogenic change due to small population sizes, low habitat availability, and low functional redundancy (Biber, 2002; Blackburn et al., 2004; Leclerc et al., 2018).                                                                                        |
| <b>Nocturnal (true or false)</b>     | Diurnal          |       | Diurnal species are more likely to be disturbed by human activity (e.g., traffic) and diurnal activity                                                                                                                                                                                                           |

---

---

has been connected to extinction risk (Purvis et al., 2000).

---

83

84 **METHODS:**

85 **DATA:**

86 We collected information on threat status (least concern = LC, near threatened = NT, vulnerable =  
87 VU, endangered = EN, critically endangered = CR, data deficient = DD, and not evaluated = NE)  
88 and population trend (increasing = I, stable = S, decreasing = D, and unknown = U), from the  
89 IUCN (2021) for 446 primate species present in the ultrametric primate phylogeny published by  
90 Upham et al. (2019) (Figure 1). We also collected a list of active threat types affecting each species  
91 in the IUCN (2021) as defined by the Salafsky et al. (2008) threat classification system: 1 =  
92 residential and commercial development, 2 = agriculture and aquaculture, 3 = energy production  
93 and mining, 4 = transportation and service corridors, 5 = biological resource use, 6 = human  
94 intrusions and disturbance, 7 = natural system modifications, 8 = invasive and other problematic  
95 species and genes, 9 = pollution, 10 = geological events, and 11 = climate change and severe  
96 weather.

97

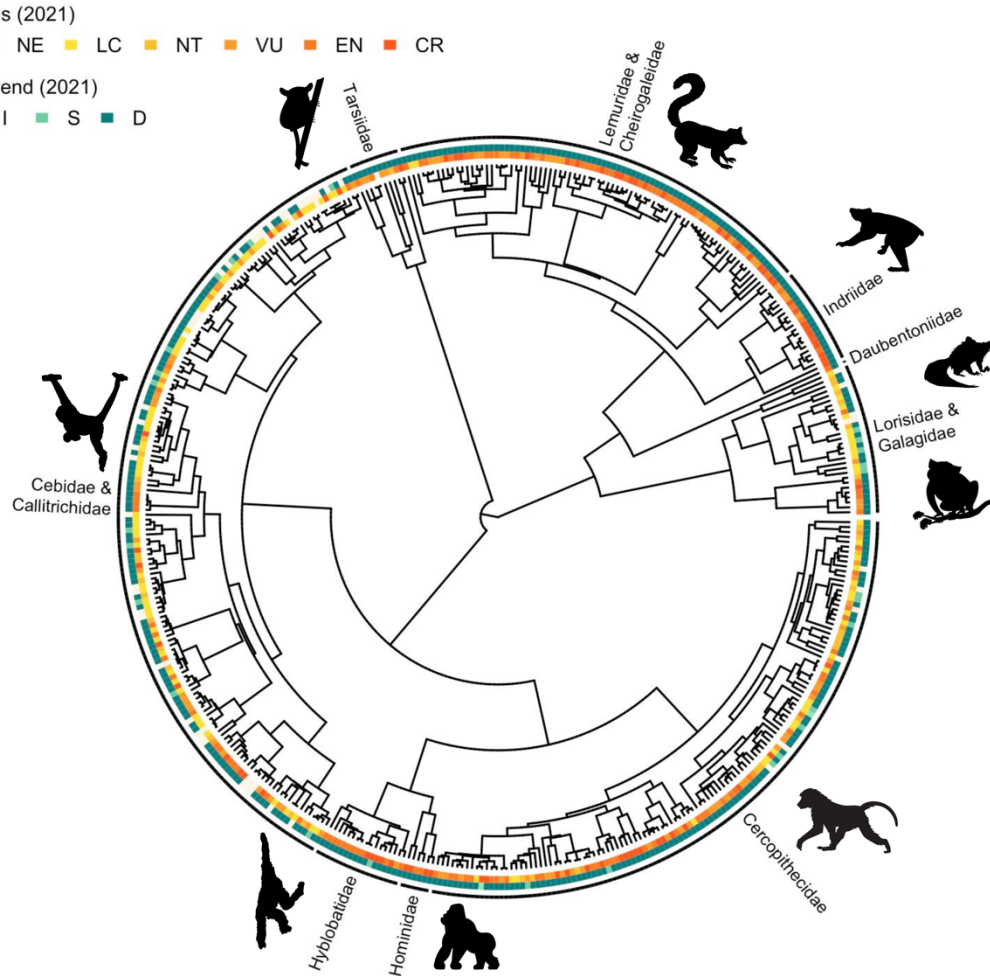

98

99 Figure 1: Phylogenetic distribution of threat status and population trends (IUCN, 2021) for 446  
100 primate species in the Upham et al. (2019) phylogeny. Images of representative species are  
101 presented next to family labels. Codes for threat status: data deficient = DD, not evaluated = NE,  
102 least concern = LC, near threatened = NT, vulnerable = VU, endangered = EN, and critically  
103 endangered = CR. Codes for population trend: unknown = U, increasing = I, stable = S, and  
104 decreasing = D (IUCN, 2021).

105

106 For each of the 446 species in our dataset, we recorded data on 10 different biological and  
107 behavioral traits that have been proposed to be associated with extinction risk from various  
108 sources: body mass (g) (Galán-Acedo et al., 2019), generation length (yrs) (IUCN, 2021), home  
109 range size (ha) (Galán-Acedo et al., 2019), group size (Rowe & Myers, 2011), brain volume  
110 (Powell et al., 2017), omnivory (true or false), social system (solitary, pair-living, harem polygyny  
111 and polygynandry) (DeCasien et al., 2017; Rowe & Myers, 2011 and other sources), lifestyle

112 (arboreal, terrestrial, or both) (Rowe & Myers, 2011 and other sources), insular (true or false)  
113 (inferred from range data available in Rowe & Myers, 2011; IUCN, 2021), and nocturnal (true or  
114 false) (Estrada et al 2017; IUCN, 2021). The full list of references for trait values is available in  
115 the Supplementary Data. Table 1 summarizes how we expected each trait to be associated with  
116 primate extinction risk. Previous studies have included geographic range size as a covariate in  
117 similar analyses (e.g., Purvis et al., 2000; Machado et al., 2022). However, a species' geographic  
118 range size is one of the main criteria used by the IUCN to assign threat status: species with small  
119 population sizes that have small or restricted geographic ranges are considered to be more  
120 imperiled (IUCN, 2021) (i.e., threatened species have small geographic ranges by definition).  
121 Because we were interested in how biological and behavioral trait contribute to extinction risk,  
122 including effects on what geographic ranges they are able to occupy, we did not include geographic  
123 range size in our analysis. Notably, by including insularity in our analysis we controlled for the  
124 fact that species on small islands may not be able to maintain geographic ranges large enough to  
125 be considered healthy by the IUCN due to geographic barriers.

126       Following Powell et al. (2017), for sexually dimorphic clades (size difference > 10%) only  
127 brain volume and body mass data from adult females were used in analysis. For all other species,  
128 averages for all adults measured in the original source were used. Species found exclusively on  
129 Madagascar, Borneo, or Sumatra were not scored as insular since these islands are large enough  
130 to support large geographic ranges comparable to many mainland species. Further details on  
131 operational definitions and trait coding are provided in the Supplementary Materials, along with a  
132 correlation matrix of all traits and response variables (Figure S1), and a comparison of trait data  
133 from different sources (Figures S2, S3, and S4).

134

### 135 ANALYSIS:

#### 136 *Trait imputation*

137 The availability of data varied across the species in our dataset. Percentages of species with missing  
138 trait data were: body mass (6%), omnivory (17%), generation length (23%), home range size  
139 (25%), group size (39%), and brain volume (46%). Restricting the analysis to only species with  
140 observed data on all traits reduced our sample size of species by over half (e.g., to from n=430 to  
141 n=151 in our analysis of threat status). We thus opted to use multiple imputation to avoid losing  
142 species from our analysis where one or more traits had missing observations. The main advantage



143 of imputation is that it avoids a loss of statistical power caused by reduced sample sizes due to  
144 missing trait data and that it reduces potential biases in parameter estimates caused by eliminating  
145 missing observations (see Nakagawa & Freckleton, 2008). For instance, if missing observations  
146 are not missing completely at random, the relationship between two variables could change when  
147 they are excluded from analysis (Nakagawa & Freckleton, 2008). In analyses with more than one  
148 independent variable imputation also prevents the loss of real information if some variables have  
149 better data coverage than others. For example, if an analysis has one independent variable with  
150 100% data coverage and a second independent variable with only 80% data coverage, imputation  
151 will allow all observations for the first trait to be kept in the analysis by substituting the 20% of  
152 missing values for the second variable.

153 Multiple imputation was accomplished using phylogenetic information and data for other  
154 traits. We started with phylogenetic multiple imputation using 100 randomly sampled trees  
155 available from Upham et al. (2019). The imputation of traits was ordered so that imputed  
156 information could be used to inform subsequent model fits along with phylogenetic information  
157 (e.g., once body mass was imputed it was used to inform model fits for the imputation of other  
158 variables). From each tree, we generated a variance-covariance matrix which we then dissolved  
159 into 445 eigenvectors using the ‘PVRdecomp’ function from the R package PVR (Santos et al.,  
160 2018). Using forward-backward model selection, we determined which phylogenetic eigenvectors  
161 and traits had the best support for inclusion in models predicting each trait with missing data based  
162 on Akaike information criterion (AICc) scores using the ‘stepAIC’ function from the MASS R  
163 package (Ripley et al., 2013). We chose how many eigenvectors to include in model selection for  
164 the imputation based on model performance in cross validation (Table S1). The top model for each  
165 trait was used to impute values for each species missing data using the ‘predict’ function from the  
166 car package in R (Fox et al., 2012). To propagate error, we then used the fits and standard  
167 deviations associated with predicted values to take a randomly sampled trait value for each species  
168 from the normal or binomial distribution (depending on whether traits were continuous or binary).

169 This imputation process was repeated once for each tree, resulting in 100 imputed datasets.  
170 We performed a leave-one-out cross-validation of each imputation, where we removed observed  
171 datapoints and used our imputation method to predict their value. When comparing these  
172 predictions to the actual observed datapoints performance proved to be good in all cases (predictive  
173 accuracy > 0.8 for continuous variables and area under the ROC curve > 0.8 for binary variables;

174 see Table S1).

175

176 *Modelling threat status, population trends, and threat types*

177 We ran multiple models to test predictors of three types of outcomes for primate populations. First,  
178 we tested which biological and behavioral traits are associated with the threat status of a species.  
179 Second, we tested the effects of species' behavioral and biological traits on population trends (i.e.,  
180 population growth or decline). Third, we tested which traits were associated with species  
181 susceptibility to the most important threats that primate species face.

182 To determine which biological and behavioral traits are associated with threat status, we  
183 ran two phylogenetic generalized linear mixed models using Bayesian approximation as  
184 implemented in the MCMCglmm R package (Hadfield, 2010). The first model had an ordinal error  
185 structure, and the response variable was an ordinal measure of threat status scored as follows:  
186 LC=0, NT=1, VU=2, EN=3, and CR=4 (Butchart et al., 2007). We ran the second model with a  
187 threshold error structure; here the response variable was threat status scored as a binary outcome  
188 where species were scored as either being threatened (VU, EN, or CR) (scored as 1) or not  
189 threatened (NT or LC) (scored as 0).

190 To test the effects of traits on population trends we ran a third phylogenetic generalized  
191 linear mixed model with a threshold error structure (Hadfield, 2010). In this model, each species  
192 was assigned a binary outcome of either declining (scored as 1) or not declining (i.e., stable or  
193 increasing) (scored as 0).

194 Finally, to determine which biological and behavioral traits were associated with species'  
195 susceptibility to the most important threats that primate species face, we ran five phylogenetic  
196 generalized linear mixed models with threshold error structures (Hadfield, 2010), one for each of  
197 the top five threats to primates identified by the IUCN (2021). These top five threats identified for  
198 primate species were: 1 = residential and commercial development (35% of species), 2 =  
199 agriculture and aquaculture (80%), 3 = energy production and mining (22%), 5 = biological  
200 resource use (82%), and 7 = natural system modifications (23%). Here, each of our five models  
201 had a binary outcome of 1 (indicating that a species was affected by a particular threat) or 0  
202 (indicating that a species was not affected by the threat).

203 Each model described above was run on 100 imputed datasets and phylogenies to account  
204 for uncertainty in phylogeny and trait estimates (Nakagawa & De Villemereuil, 2019). Models ran

205 a total of 550,001 iterations, with a thinning interval of 500 and a burn-in of 50,000 to ensure  
206 convergence had occurred. We confirmed convergence had occurred by assessing trace plots after  
207 analyses finished running (Hadfield, 2010). Species were dropped from analyses when the true  
208 value of a response variable was unknown by the IUCN (2021) (e.g., if the threat status was DD  
209 or NE). Traits were included as fixed effects and continuous variables were ln-transformed,  
210 centered with respect to the mean, and scaled by 2 standard deviations in all models to make their  
211 effect sizes comparable to those reported for binary variables (Gelman, 2008). We used a weakly  
212 informative gelman prior for fixed effects.

213 We also tested the hypothesis that some traits previously shown to be associated with  
214 primate extinction risk are losing signal as more species become imperiled, for example, if  
215 anthropogenic threats are becoming so overwhelming that all species are beginning to suffer  
216 regardless of their attributes. This analysis involved repeating our analyses of threat status using  
217 an older IUCN threat status data and species list (obtained from Harcourt & Parks, 2003).

218 To interpret the output from our Bayesian analyses, we provide (i) the distribution of  
219 posterior means for tests from all 100 imputed datasets in graphical form (Figures 2 and 3), (ii) the  
220 89% credible intervals (per McElreath, 2018) from the full posterior distribution of estimates in  
221 graphical form (Figures 2 and 3), and (iii) the percentage of iterations from each set of 100 models  
222 that were consistently positive or negative (Tables S2 to S13). We focused on results that were  
223 most supported based on these outcomes. For the purposes of providing an estimate of the  
224 magnitude of an effect in the main text, posterior means were pooled across datasets using Rubin's  
225 rules (Nakagawa & De Villemereuil, 2019) (hereafter, "pooled posterior mean").

226

## 227 **RESULTS:**

### 228 *Predictors of threat status and population trends*

229 When scored as an ordinal outcome (LC=0, NT=1, VU=2, EN=3, and CR=4), threat status was  
230 positively associated with insularity (pooled posterior mean = 1.217; 100% of 100,100 posterior  
231 estimates > 0) and, albeit not as strongly, with body mass (pooled posterior mean = 0.995; 94%  
232 estimates > 0) (Figure 2; Tables S2) across 430 species with known threat statuses. Ordinal threat  
233 status was negatively associated with omnivory (pooled posterior mean = -0.475; 95% estimates  
234 < 0) and group size (pooled posterior mean = -0.601; 95% estimates < 0) (Figure 2; Table S2). In  
235 our analysis using older IUCN data, we found that only insularity (pooled posterior mean = 2.255;

236 100% estimates > 0) and home range size (pooled posterior mean = 1.532; 100% estimates > 0)  
237 were associated with threat status (ordinal) in the predicted direction (Table S3).

238 Threat status was not strongly associated with any biological or behavioral traits when  
239 scored as a binary response (Figure 2; Table S4). We repeated this analysis removing imputed  
240 datapoints to see if their inclusion affected the lack of strong associations. We also ran three  
241 separate models with body mass, generation length, and brain volume as sole predictors to  
242 determine if correlations among these predictors (see Figure S1) in the full models affected the  
243 results. Results from these additional analyses again consistently showed no strong effect of any  
244 traits (Tables S5 and S6). In our analysis using older IUCN data, we found that insularity (pooled  
245 posterior mean = 2.565; 100% estimates > 0) and home range size (pooled posterior mean = 1.116;  
246 99% estimates > 0) were associated with threat status (binary) in the predicted direction (Table  
247 S7). Population trend was not consistently associated with any biological or behavioral traits across  
248 401 species with known population trends (Figure 2; Table S8).

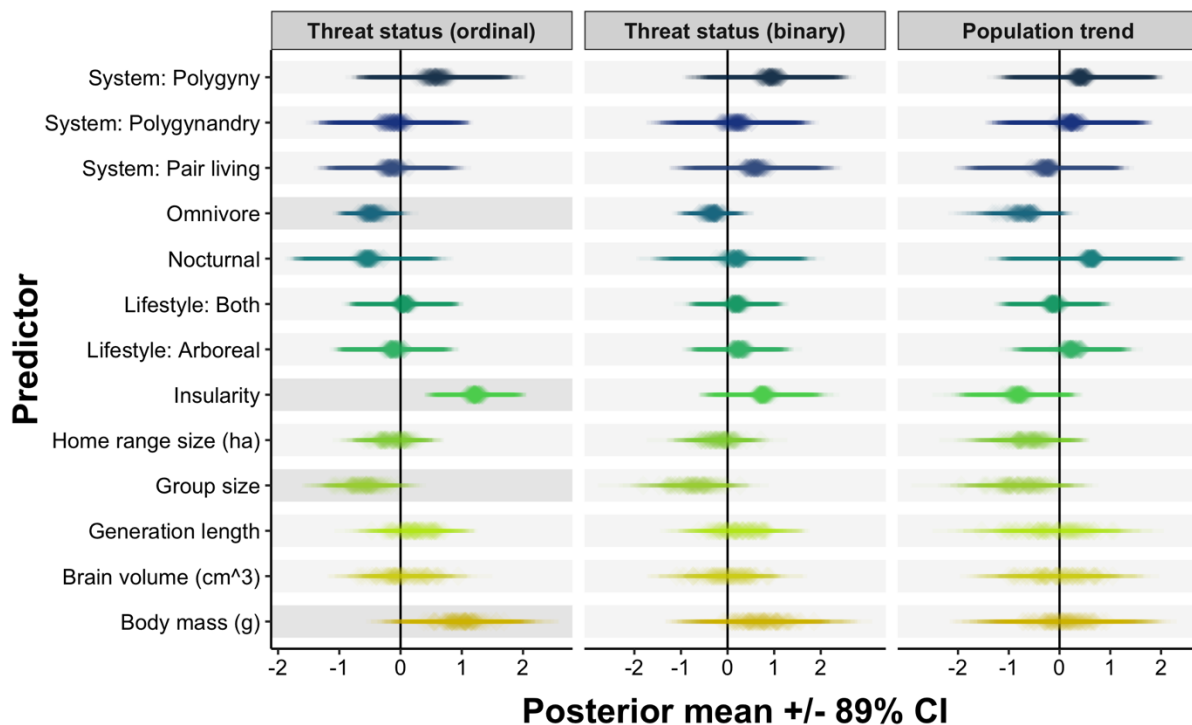

249  
250 **Figure 2:** Outcomes from three sets of models testing the relationship between traits and: threat  
251 status scored as an ordinal variable (first panel), threat status scored as a binary variable (second  
252 panel), and population trend scored as a binary variable (third panel). Each cell contains 100  
253 posterior means (plotted as translucent diamonds) with their associated 89% credible intervals

254 (plotted as translucent horizontal lines) obtained from 100 MCMCglmm models run with 100  
 255 randomly sampled phylogenies across 100 trait datasets with missing datapoints obtained through  
 256 multiple imputation. Darker shading behind effects interpreted in text. Continuous variables were  
 257 ln-transformed, centered with respect to the mean, and scaled by 2 standard deviations.

258

259 *Predictors of specific threat types*

260 Our analyses of threat types included 404 species with known threats (Tables S9 to S13). Species  
 261 with larger body masses were more likely to be affected by threat 1 = residential and commercial  
 262 development (pooled posterior mean = 1.001; 96% estimates > 0; Table S9) and threat 3 = energy  
 263 production and mining (pooled posterior mean = 1.267; 99% estimates > 0; Table S11) (Figure 3).  
 264 Insularity was negatively associated with threat 1 = residential and commercial development  
 265 (pooled posterior mean = -0.755; 98% estimates < 0; Table S9), threat 3 = energy production and  
 266 mining (pooled posterior mean = -1.811; 100% estimates < 0; Table S11), and threat 7 = natural  
 267 system modifications (pooled posterior mean = -1.312; 100% estimates < 0; Table S13) (Figure  
 268 3). Species living a strictly arboreal lifestyle were more likely to be affected by threat 1 =  
 269 residential and commercial development than strictly terrestrial species (i.e., the baseline) (pooled  
 270 posterior mean = 1.023; 97% estimates > 0; Table S9) (Figure 3).

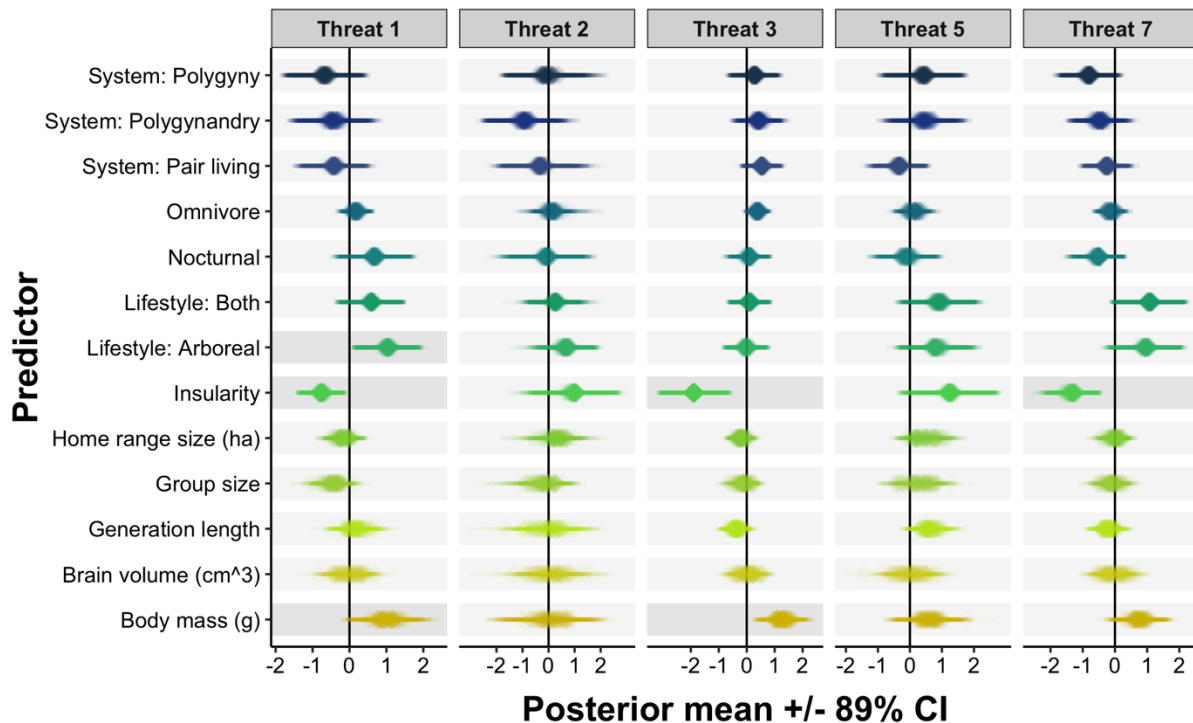

271

272 Figure 3: Outcomes from five sets of models testing the relationship between traits and species  
273 susceptibility to: threat 1 = residential and commercial development (first panel), threat 2 =  
274 agriculture and aquaculture (second panel), threat 3 = energy production and mining (third panel),  
275 threat 5 = biological resource use (fourth panel), and threat 7 = natural system modifications (fifth  
276 panel). Each cell contains 100 posterior means (plotted as translucent diamonds) with their  
277 associated 89% credible intervals (plotted as translucent horizontal lines) obtained from 100  
278 MCMCglmm models run with 100 randomly sampled phylogenies across 100 trait datasets with  
279 missing datapoints obtained through multiple imputation. Darker shading behind effects  
280 interpreted in text. Continuous variables were ln-transformed, centered with respect to the mean,  
281 and scaled by 2 standard deviations.

282

### 283 **DISCUSSION:**

284 We investigated the correlates of extinction risk and threat susceptibility in primates using  
285 phylogenetic comparative methods to analyze the most complete and up-to-date set of trait data  
286 and IUCN data. One novelty of our approach involved the use of phylogenetic and trait-based  
287 imputation of missing data. Our analyses revealed that larger-bodied and more insular species  
288 exhibit higher threat status, while those that are more omnivorous or live in larger groups have  
289 lower threat status. When looking at specific threats, we found that larger-bodied and arboreal  
290 species are more vulnerable to key threats, while insular species are less vulnerable to these threats.

291 Our analyses with binary outcomes included threat status scored as threatened versus non-  
292 threatened and population trend scored as declining versus not declining. These analyses revealed  
293 that most traits are not strong predictors of whether a given primate species is considered  
294 threatened (contrary to findings in other taxonomic groups, such as birds; Lee & Jetz, 2011). When  
295 we scored threat status ordinally – with five ranked categories from least concern to critically  
296 endangered – higher threat status was associated with insularity, large body mass, omnivory, and  
297 small group size, consistent with our predictions for these traits. Therefore, primate species that  
298 are most imperiled, and thus score highest in ordinal threat status, do tend to be those with  
299 biological and behavioral predispositions to extinction.

300 We also considered how the effects of predictors changed over time. When applying the  
301 same methods to analyze a 1999 IUCN dataset, we found that insularity and home range size  
302 shared a positive relationship with both binary and ordinal threat status, but other traits were not



303 meaningfully associated with threat status. This pattern of results using newer versus older data  
304 indicates that some traits (i.e., home range size) are becoming less important to extinction risk as  
305 the effects of anthropogenic activity become increasingly overwhelming. The fact that traits  
306 identified in our analysis of ordinal 2021 threat status (i.e., body mass, group size, and omnivory)  
307 do not come out as strongly in our analysis with older data could indicate that these traits are  
308 beginning to have a larger signal over time, or that the larger number of species in our 2021 dataset  
309 (a consequence of taxonomic reevaluations in many clades; Creighton et al., 2022) enabled us to  
310 more powerfully detect effects of these traits.

311 Previous studies have found an effect of variables not shown to explain meaningful  
312 variation in our analysis. For example, Ducatez et al. (2020) investigated whether threat status  
313 covaries with innovativeness, which is a known measure of behavioral flexibility associated with  
314 general intelligence (Reader & Laland, 2002; Reader et al., 2011). We did not find an effect of  
315 brain size, another known measure of behavioral flexibility and general intelligence (Reader et al.,  
316 2011; Creighton et al. 2021), and correlate of innovativeness, in our analysis. The caveats  
317 associated with each of these measures is discussed in Creighton et al. (2021), including the  
318 difficulty of adequately controlling for literature effort when estimating innovativeness and the  
319 small sample sizes used to estimate average brain sizes for many species. However, our difference  
320 in results could point to the fact that different traits contribute to heightened extinction risk for  
321 these two clades, and that the relationship between some traits and extinction risk may be far more  
322 complicated than originally expected. Species with higher behavioral flexibility and general  
323 intelligence may be less at risk of extinction because they are better equipped to find novel  
324 solutions that allow them to overcome environmental challenges (Beever et al., 2017; Ducatez et  
325 al., 2020). However, the relationship between behavioral flexibility and extinction may be more  
326 complex, particularly in a clade like primates where innovations are frequent and human conflict  
327 is common. Certain behavioral innovations can help species to avoid human conflict and endure  
328 habitat modifications, such as novel approaches for accessing foods or shifting to new food  
329 resources (Beever et al., 2017). However, other innovative behaviors can increase human-wildlife  
330 conflict. In many primate species, crop-raiding and garbage eating have become common practice  
331 and indicate their flexibility to survive in changing environments (e.g., chimpanzees and baboons;  
332 Maples et al., 1976; Hahn et al., 2003; Hockings et al., 2009). These behaviors bring animals in  
333 direct conflict with humans and, in some cases, attract them to lower quality habitats. Future

334 contributions should further address the paradox of how flexibility both helps and hinders survival,  
335 and what this means for species' persistence.

336 In analyses assessing predictors of direct threats, we found that strictly arboreal species  
337 were more likely to be threatened with residential and commercial development – a major driver  
338 of deforestation in many regions. We also found that species with large body masses were more  
339 likely to be affected by residential and commercial development and energy production and  
340 mining. Thus, the tendency of larger bodied species to be severely threatened is likely influenced  
341 by development and energy/mining activities. Finally, insular species were less likely to be  
342 vulnerable to multiple threats (residential and commercial development, energy production and  
343 mining, and natural system modifications) despite being more likely to be highly threatened. This  
344 indicates that the high threat statuses of insular species may not be driven by anthropogenic  
345 activity. Instead, their small geographic ranges enforced by geographic barriers could simply make  
346 it impossible to maintain healthy population sizes, despite not being subject to major threats.

347 There are some limitations to our analyses. One issue involves correlated predictor  
348 variables. Body mass, generation length, and brain volume were highly correlated in our dataset  
349 (correlation coefficients range between 0.6 and 0.9). We included these predictors in the same  
350 models to identify how they independently contributed to extinction risk and threat vulnerability  
351 (Freckleton, 2002). However, this creates the possibility of collinearity in model estimates for  
352 these variables. Increased uncertainty (i.e., wide credible intervals) around estimates for these three  
353 traits indeed point to some collinearity among estimates. We therefore investigated the effects of  
354 these variables individually in separate models, which yielded largely consistent results. Secondly,  
355 like most previous studies, response variables in our analysis come from IUCN assessments. While  
356 the IUCN maintains the largest global dataset on species extinction risk and threats useful for  
357 comparative analyses, these measures are vulnerable to errors in empirical data and in models used  
358 to estimate population declines and extinction risk (Rueda-Cediel et al., 2018). As a result, there  
359 is likely to be uncaptured uncertainty associated with the measures of extinction risk used in our  
360 analyses.

361 Information about how biological and behavioral traits contribute to species' susceptibility  
362 to direct threats has been a persistent knowledge gap in the conservation literature, particularly for  
363 primates (Estrada et al., 2017). We provide a first step in addressing this knowledge gap by linking  
364 traits to key threats responsible for population declines. This approach has potential to be expanded



365 to other clades. Understanding the biological and behavioral predictors of threat susceptibility in  
366 broader range of taxa could help groups like the IUCN to identify which threats pose the most  
367 imminent harm to species with shared characteristics. There is also an opportunity to apply the  
368 knowledge contributed here to projections about which species are next to become threatened: we  
369 propose that factoring in traits and threat information could provide more powerful inference and  
370 will lead to more proactive monitoring of species that face the greatest risks in the future. For  
371 instance, strictly arboreal species living in regions with residential development may be expected  
372 to decline at a faster rate than other species without these characteristics.

373 In summary, by taking advantage of statistical approaches for dealing with missing data  
374 and Bayesian inference, we have shown that multiple traits contribute to primate threat status. Our  
375 findings suggest that the effects of some traits, such as home range size, have weakened over the  
376 past 20 years, indicating that the traits that influence a species' threat status are changing as  
377 anthropogenic effects continue to transform natural landscapes. Other characteristics shown to  
378 affect extinction risk in other clades, such as behavioral flexibility, do not appear to affect primate  
379 extinction risk, suggesting that different processes likely govern extinction in different clades.  
380 Focusing on mitigating key threats, as identified here, from susceptible species' geographic ranges  
381 will be an important and necessary step for future recovery.

382  
383 **ACKNOWLEDGEMENTS:** This work was funded by Duke University and The Triangle Center  
384 for Evolutionary Medicine (TriCEM). We thank Dan Greenberg, Mark Janko, and Jarrod Hadfield  
385 for crucial statistical advice. We also thank Susan Alberts, members of the Alberts Lab at Duke  
386 University, and Brian Lerch for their comments on previous drafts of the manuscript.

387  
388 Data and code for this manuscript will be made available on publication through Zenodo.

389  
390 **REFERENCES:**  
391 Beaver, E. A., Hall, L. E., Varner, J., Loosen, A. E., Dunham, J. B., Gahl, M. K., ... & Lawler, J.  
392 J. (2017). Behavioral flexibility as a mechanism for coping with climate change. *Frontiers*  
393 *in Ecology and the Environment*, 15, 299-308.  
394 Biber, E. (2002). Patterns of endemic extinctions among island bird species. *Ecography*, 25, 661-  
395 676.

- 396 Blackburn, T. M., Cassey, P., Duncan, R. P., Evans, K. L., & Gaston, K. J. (2004). Avian extinction  
397 and mammalian introductions on oceanic islands. *Science*, 305, 1955-1958.
- 398 Boyles, J. G., & Storm, J. J. (2007). The perils of picky eating: dietary breadth is related to  
399 extinction risk in insectivorous bats. *PLoS One*, 2, e672.
- 400 Butchart, S. H., Resit Akçakaya, H., Chanson, J., Baillie, J. E., Collen, B., Quader, S., ... & Hilton-  
401 Taylor, C. (2007). Improvements to the red list index. *PloS One*, 2, e140.
- 402 Cardillo, M., & Bromham, L. (2001). Body size and risk of extinction in Australian mammals.  
403 *Conservation Biology*, 15, 1435-1440.
- 404 Cardillo, M., Mace, G. M., Jones, K. E., Bielby, J., Bininda-Emonds, O. R., Sechrest, W., ... &  
405 Purvis, A. (2005). Multiple causes of high extinction risk in large mammal species.  
406 *Science*, 309, 1239-1241.
- 407 Cardillo, M., & Meijaard, E. (2012). Are comparative studies of extinction risk useful for  
408 conservation? *Trends in Ecology & Evolution*, 27, 167-171.
- 409 Chichorro, F., Juslén, A., & Cardoso, P. (2019). A review of the relation between species traits  
410 and extinction risk. *Biological Conservation*, 237, 220-229.
- 411 Creighton, M. J., Greenberg, D. A., Reader, S. M., & Mooers, A. Ø. (2021). The role of  
412 behavioural flexibility in primate diversification. *Animal Behaviour*, 180, 269-290.
- 413 Creighton, M. J., Luo, A. Q., Reader, S. M., & Mooers, A. Ø. (2022). Predictors of taxonomic  
414 inflation and its role in primate conservation. *Animal Conservation*.
- 415 Davidson, A. D., Boyer, A. G., Kim, H., Pompa-Mansilla, S., Hamilton, M. J., Costa, D. P., ... &  
416 Brown, J. H. (2012). Drivers and hotspots of extinction risk in marine mammals.  
417 *Proceedings of the National Academy of Sciences*, 109, 3395-3400.
- 418 Davidson, A. D., Hamilton, M. J., Boyer, A. G., Brown, J. H., & Ceballos, G. (2009). Multiple  
419 ecological pathways to extinction in mammals. *Proceedings of the National Academy of  
420 Sciences*, 106, 10702-10705.
- 421 DeCasien, A. R., Williams, S. A., & Higham, J. P. (2017). Primate brain size is predicted by diet  
422 but not sociality. *Nature Ecology & Evolution*, 1, 1-7.
- 423 Ducatez, S., Sol, D., Sayol, F., & Lefebvre, L. (2020). Behavioural plasticity is associated with  
424 reduced extinction risk in birds. *Nature Ecology & Evolution*, 4, 788-793.

- 425 Estrada, A., Garber, P. A., Rylands, A. B., Roos, C., Fernandez-Duque, E., Di Fiore, A., ... & Li,  
426 B. (2017). Impending extinction crisis of the world's primates: Why primates matter.  
427 *Science Advances*, 3, e1600946.
- 428 Fox, J., Weisberg, S., Adler, D., Bates, D., Baud-Bovy, G., Ellison, S., ... & Monette, G. (2012).  
429 Package 'car'. Retrieved from: <https://cran.r-project.org/web/packages/car/index.html>.
- 430 Freckleton, R. P. (2002). On the misuse of residuals in ecology: regression of residuals vs. multiple  
431 regression. *Journal of Animal Ecology*, 71, 542–545.
- 432 Galán-Acedo, C., Arroyo-Rodríguez, V., Andresen, E., & Arasa-Gisbert, R. (2019). Ecological  
433 traits of the world's primates. *Scientific Data*, 6, 1-5.
- 434 Gelman, A. (2008). Scaling regression inputs by dividing by two standard deviations. *Statistics in  
435 Medicine*, 27, 2865–2873.
- 436 González-Suárez, M., Gómez, A., & Revilla, E. (2013). Which intrinsic traits predict vulnerability  
437 to extinction depends on the actual threatening processes. *Ecosphere*, 4, 1-16.
- 438 Hadfield, J. D. (2010). MCMC methods for multi-response generalized linear mixed models: the  
439 MCMCglmm R package. *Journal of Statistical Software*. 33, 1–22.
- 440 Hahn, N. E., Proulx, D., Muruthi, P. M., Alberts, S., & Altmann, J. (2003). Gastrointestinal  
441 parasites in free-ranging Kenyan baboons (*Papio cynocephalus* and *P. anubis*).  
442 *International Journal of Primatology*, 24, 271-279.
- 443 Harcourt, A. H., & Parks, S. A. (2003). Threatened primates experience high human densities:  
444 adding an index of threat to the IUCN Red List criteria. *Biological Conservation*, 109, 137-  
445 149.
- 446 Hockings, K. J., Anderson, J. R., & Matsuzawa, T. (2009). Use of wild and cultivated foods by  
447 chimpanzees at Bossou, Republic of Guinea: feeding dynamics in a human-influenced  
448 environment. *American Journal of Primatology*, 71, 636-646.
- 449 Höglund, J. (1996). Can mating systems affect local extinction risks? Two examples of lek-  
450 breeding waders. *Oikos*, 77, 184-188.
- 451 IUCN. (2021). The IUCN Red List of Threatened Species Version 2021-1. IUCN Red List of  
452 Threatened Species. Retrieved from: <https://www.iucnredlist.org/en>.
- 453 Leclerc, C., Courchamp, F., & Bellard, C. (2018). Insular threat associations within taxa  
454 worldwide. *Scientific Reports*, 8, 1-8.

- 455 Lee, T. M., & Jetz, W. (2011). Unravelling the structure of species extinction risk for predictive  
456 conservation science. *Proceedings of the Royal Society B: Biological Sciences*, 278, 1329-  
457 1338.
- 458 Machado, F. F., Jardim, L., Dinnage, R., Brito, D., & Cardillo, M. (2022). Diet disparity and  
459 diversity predict extinction risk in primates. *Animal Conservation*.
- 460 Maples, W. R., Maples, M. K., Greenhood, W. F., & Walek, M. L. (1976). Adaptations of crop-  
461 raiding baboons in Kenya. *American Journal of Physical Anthropology*, 45, 309-315.
- 462 Matthews, L. J., Arnold, C., Machanda, Z., & Nunn, C. L. (2011). Primate extinction risk and  
463 historical patterns of speciation and extinction in relation to body mass. *Proceedings of the*  
464 *Royal Society B: Biological Sciences*, 278, 1256-1263.
- 465 McElreath, R. (2018). Statistical rethinking: A Bayesian course with examples in R and Stan.  
466 Chapman and Hall/CRC, New York.
- 467 Munstermann, M. J., Heim, N. A., McCauley, D. J., Payne, J. L., Upham, N. S., Wang, S. C., &  
468 Knope, M. L. (2022). A global ecological signal of extinction risk in terrestrial vertebrates.  
469 *Conservation Biology*, 36, e13852.
- 470 Murray, K. A., Verde Arregoitia, L. D., Davidson, A., Di Marco, M., & Di Fonzo, M. M. (2014).  
471 Threat to the point: improving the value of comparative extinction risk analysis for  
472 conservation action. *Global Change Biology*, 20, 483-494.
- 473 Nakagawa, S., & De Villemereuil, P. (2019). A general method for simultaneously accounting for  
474 phylogenetic and species sampling uncertainty via Rubin's rules in comparative analysis.  
475 *Systematic Biology*, 68, 632-641.
- 476 Nakagawa, S., & Freckleton, R. P. (2008). Missing inaction: the dangers of ignoring missing data.  
477 *Trends in Ecology & Evolution*, 23, 592-596.
- 478 Navarrete, A. F., Reader, S. M., Street, S. E., Whalen, A., & Laland, K. N. (2016). The coevolution  
479 of innovation and technical intelligence in primates. *Philosophical Transactions of the*  
480 *Royal Society B: Biological Sciences*, 371, 20150186.
- 481 Powell, L. E., Isler, K., & Barton, R. A. (2017). Re-evaluating the link between brain size and  
482 behavioural ecology in primates. *Proceedings of the Royal Society B: Biological Sciences*,  
483 284, 20171765.

- 484 Purvis, A., Cardillo, M., Grenyer, R., & Collen, B. (2005). Correlates of extinction risk: phylogeny,  
485 biology, threat and scale. In Purvis, A., Gittleman, J.L., & Brooks, T. (Eds.), *Phylogeny*  
486 *and Conservation* (pp. 295-316). Cambridge University Press, Cambridge.
- 487 Purvis, A., Gittleman, J. L., Cowlishaw, G., & Mace, G. M. (2000). Predicting extinction risk in  
488 declining species. *Proceedings of the Royal Society B: Biological Sciences*, 267, 1947-  
489 1952.
- 490 Reader, S. M., Hager, Y., & Laland, K. N. (2011). The evolution of primate general and cultural  
491 intelligence. *Philosophical Transactions of the Royal Society B: Biological Sciences*, 366,  
492 1017-1027.
- 493 Reader, S. M., & Laland, K. N. (2002). Social intelligence, innovation, and enhanced brain size in  
494 primates. *Proceedings of the National Academy of Sciences*, 99, 4436-4441.
- 495 Ripley, B., Venables, B., Bates, D. M., Hornik, K., Gebhardt, A., Firth, D., & Ripley, M. B. (2013).  
496 Package ‘MASS’. CRAN Repository, See [http://cran.r-](http://cran.r-project.org/web/packages/MASS/MASS.pdf)  
497 [project.org/web/packages/MASS/MASS.pdf](http://cran.r-project.org/web/packages/MASS/MASS.pdf).
- 498 Rowe, N., & Myers, M. (2011). *All the world's primates*. Primate Conservation, Inc. Retrieved  
499 from: <https://www.alltheworldsprimates.org>.
- 500 Rueda-Cediel, P., Anderson, K. E., Regan, T. J., & Regan, H. M. (2018). Effects of uncertainty  
501 and variability on population declines and IUCN Red List classifications. *Conservation*  
502 *Biology*, 32, 916-925.
- 503 Rylands, A. B., & Mittermeier, R. A. (2014). Primate taxonomy: species and conservation.  
504 *Evolutionary Anthropology*, 23, 8-10.
- 505 Salafsky, N., Salzer, D., Stattersfield, A. J., Hilton-Taylor, C. R. A. I. G., Neugarten, R., Butchart,  
506 S. H., ... & Wilkie, D. (2008). A standard lexicon for biodiversity conservation: unified  
507 classifications of threats and actions. *Conservation Biology*, 22, 897-911.
- 508 Santos, T., Diniz-Filho, J. A., e Luis, T. R., Bini, M., & Santos, M. T. (2018). Package ‘PVR’.  
509 Retrieved from: <https://cran.r-project.org/web/packages/PVR/index.html>.
- 510 Upham, N. S., Esselstyn, J. A., & Jetz, W. (2019). Inferring the mammal tree: Species-level sets  
511 of phylogenies for questions in ecology, evolution, and conservation. *PLoS Biology*, 17, 1-  
512 44.
- 513 Woodroffe, R., & Ginsberg, J. R. (1998). Edge effects and the extinction of populations inside  
514 protected areas. *Science*, 280, 2126-2128.
